# Supplementary material
Source: PubMed Central journal article supplement (PMC8406556)
Supplement: NIHMS1719457-supplement-Supplementary_Figures.pdf [file NIHMS1719457-supplement-Supplementary_Figures.pdf]

## Cohort of 1215 pediatric cancers by subtype

### Brain tumors, n = 219

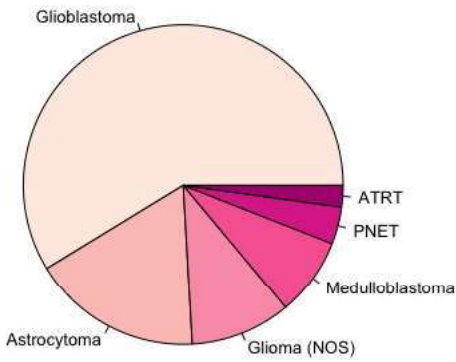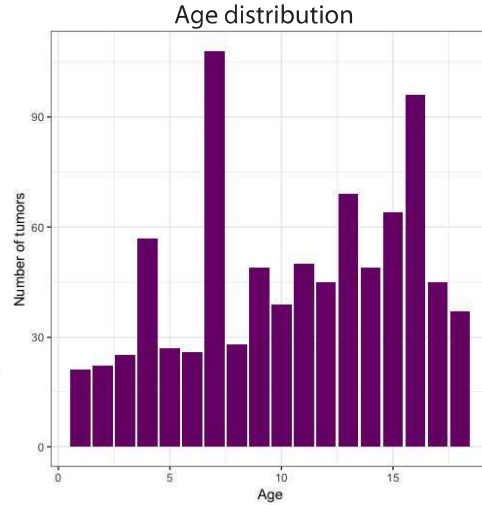

### % of RAS/MAPK mutant tumors by subtype

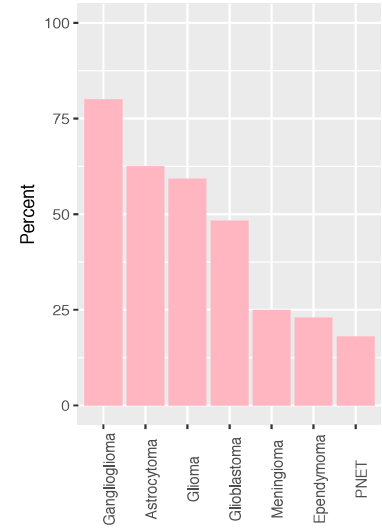

### Haematological malignancies, n = 217

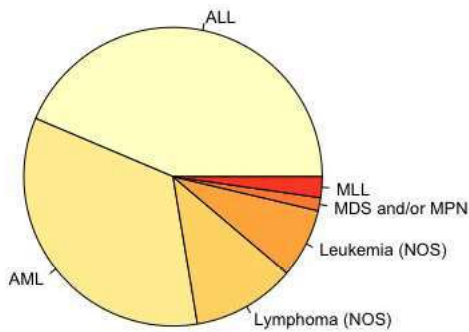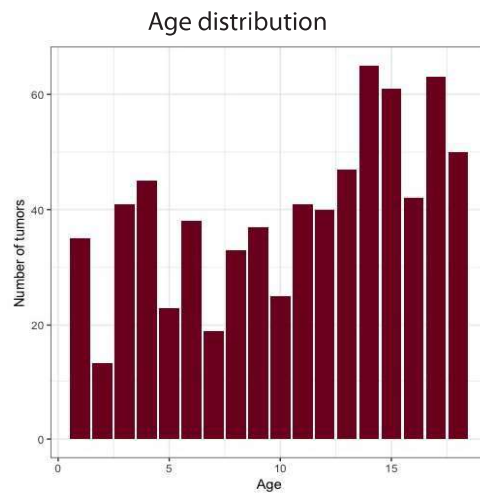

### % of RAS/MAPK mutant tumors by subtype

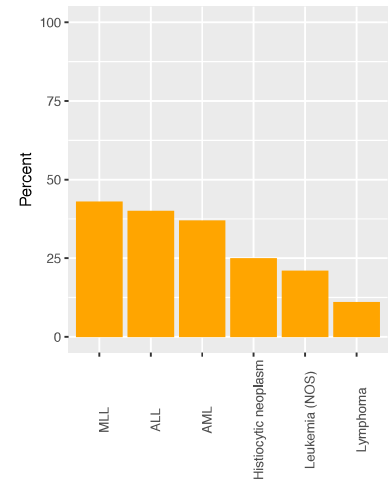

### Extracranial embryonal, n = 214

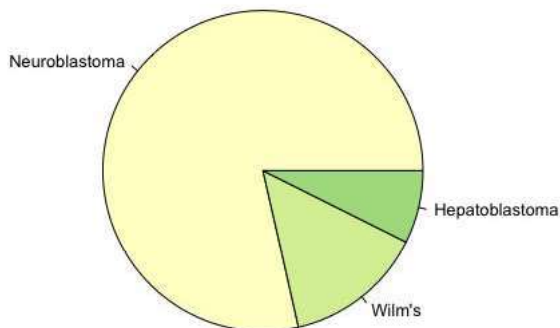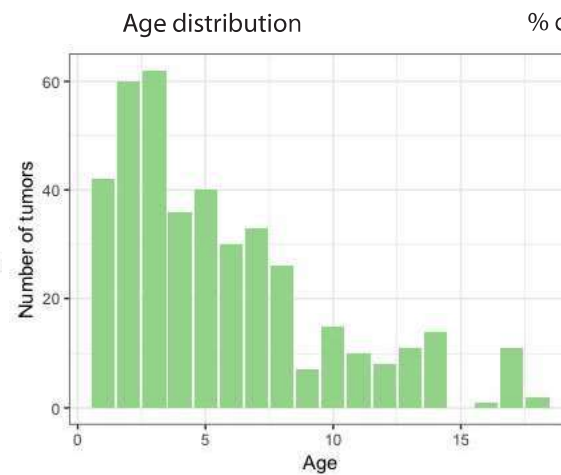

### % of RAS/MAPK mutant tumors by subtype

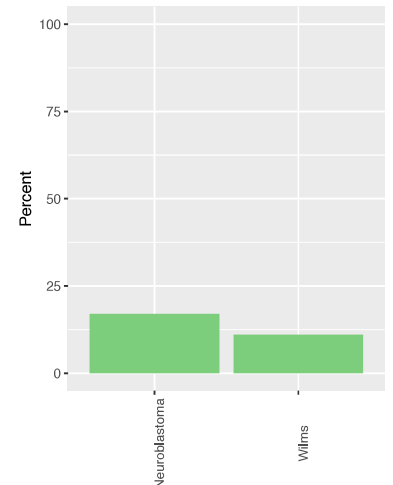

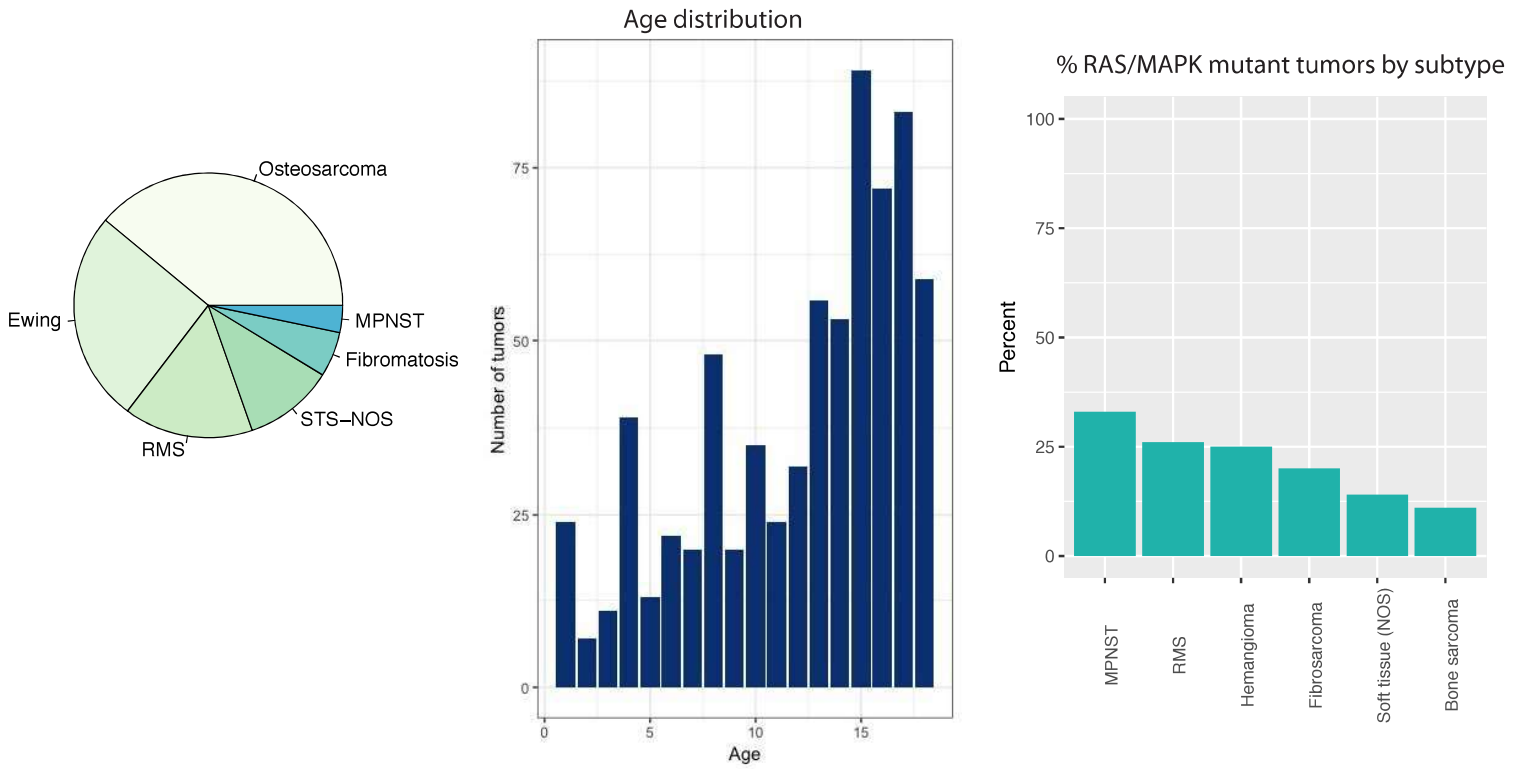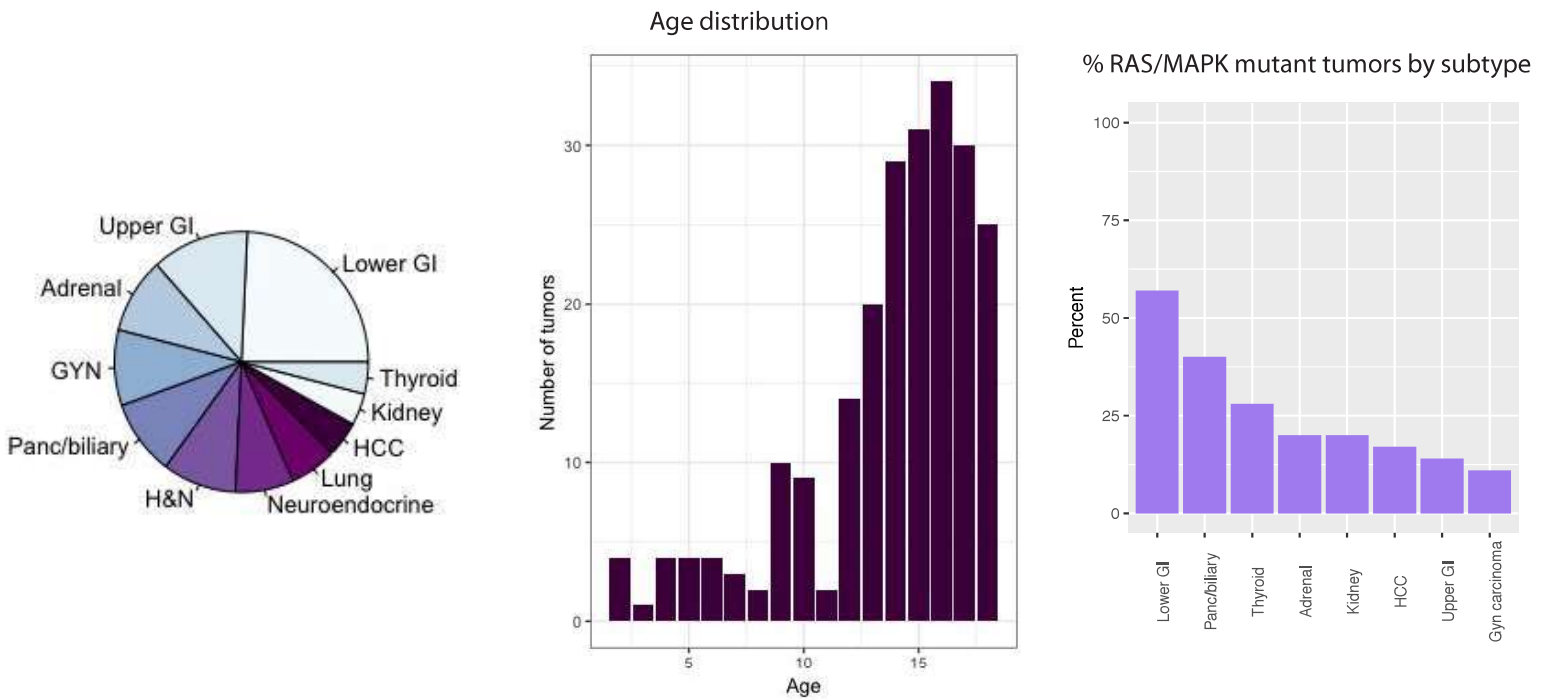

Supplemental Figure 1: Major subtypes in 1215 pediatric cancers (Ages 0-18). Colored bar charts display age distribution per subtype and grey bar charts display frequency of RAS/MAPK pathway mutations

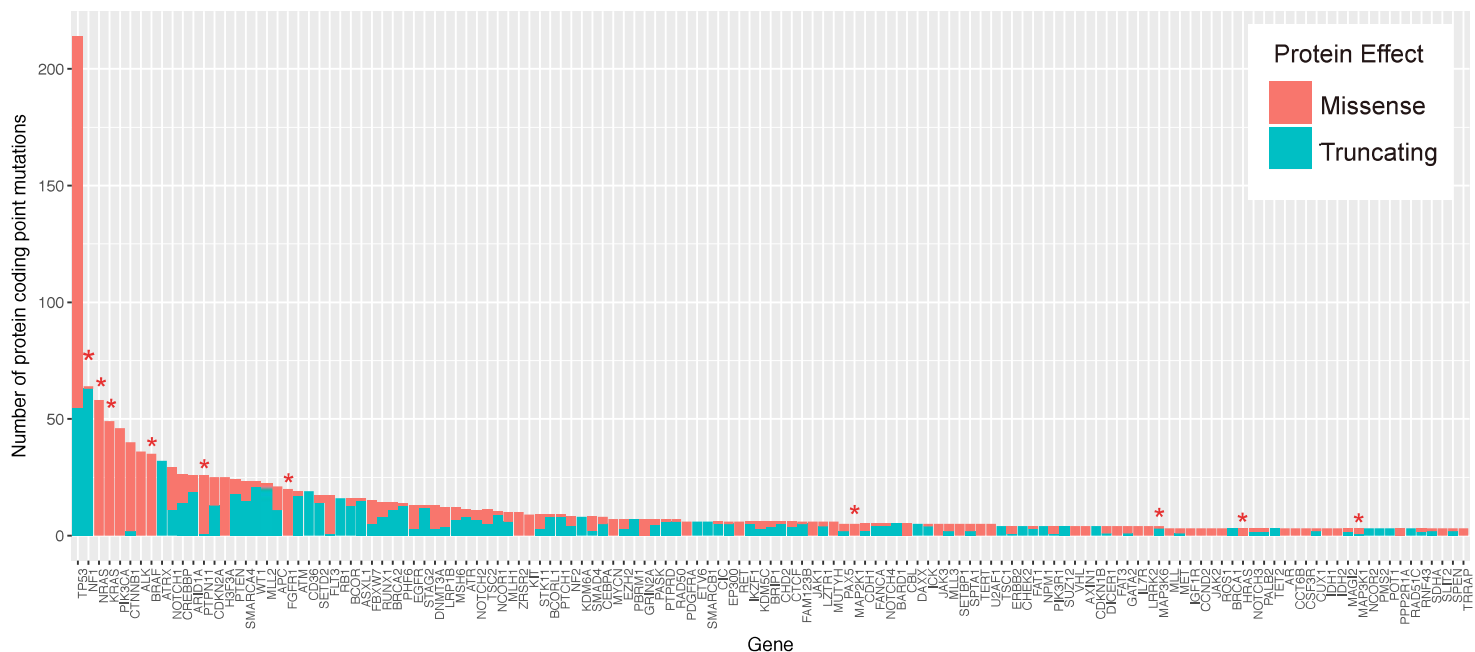

Supplemental Figure 2: Bar plot displaying frequency of protein coding point mutations resulting in a single amino acid change or truncation in 1215 pediatric tumors. Genes with less than 3 occurrences in the cohort were excluded.

\* = RAS/MAPK pathway actors

A

Modify Query Querying 1825 samples in 3 studies ⓘ

Gene Set / Pathway is altered in 788 (43.2%) of queried samples

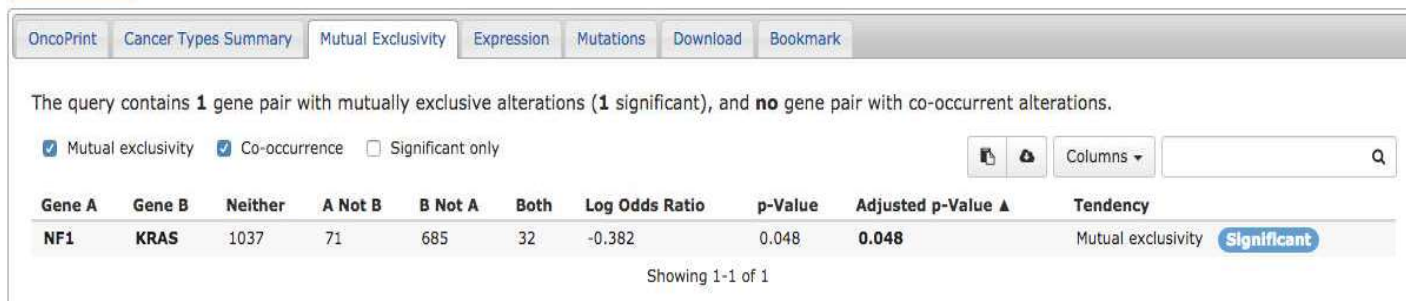

Modify Query Querying 1825 samples in 3 studies ⓘ

Gene Set / Pathway is altered in 788 (43.2%) of queried samples

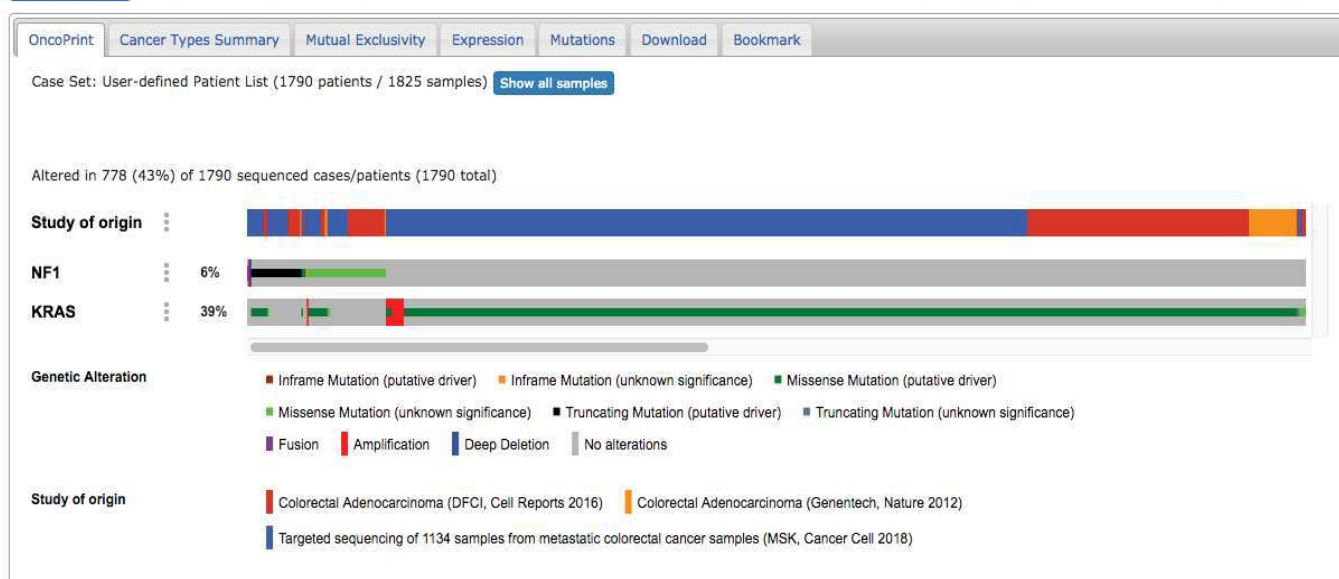

B

Altered in 174 (10%) of 1764 sequenced cases/patients (1764 total)

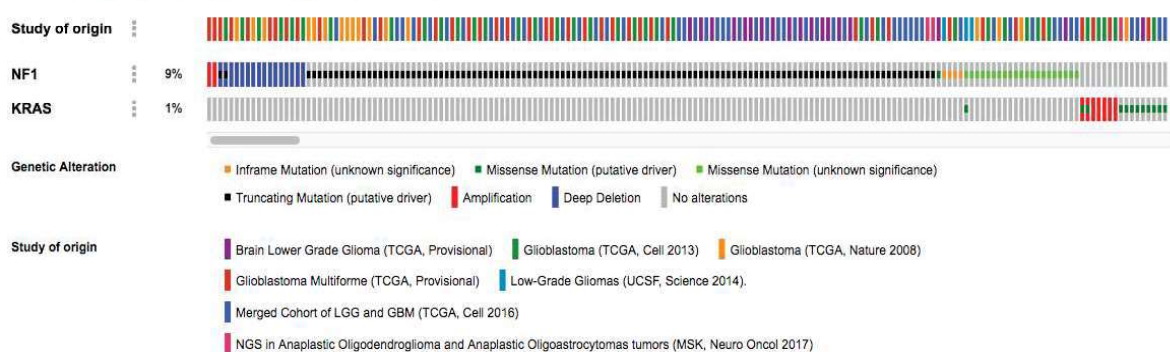

Supplemental Figure 3: Confirmatory tissue specific preferences for MAPK pathway mutations in 1825 colorectal cancers (A) and 1764 gliomas (B). KRAS dominance is observed in GI vs. NF1 dominance in CNS tumors, mimicking pediatric data.

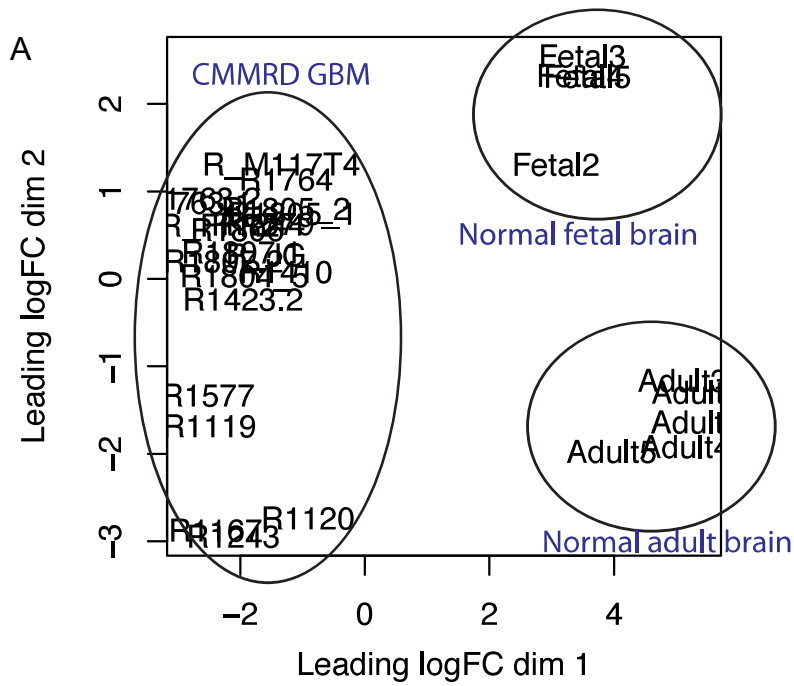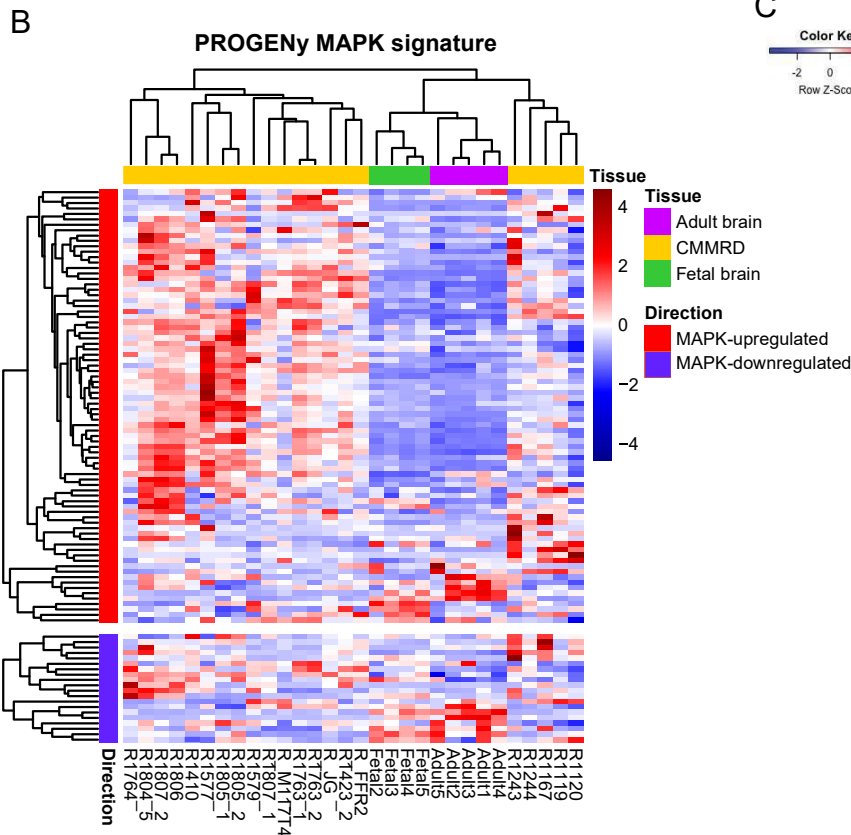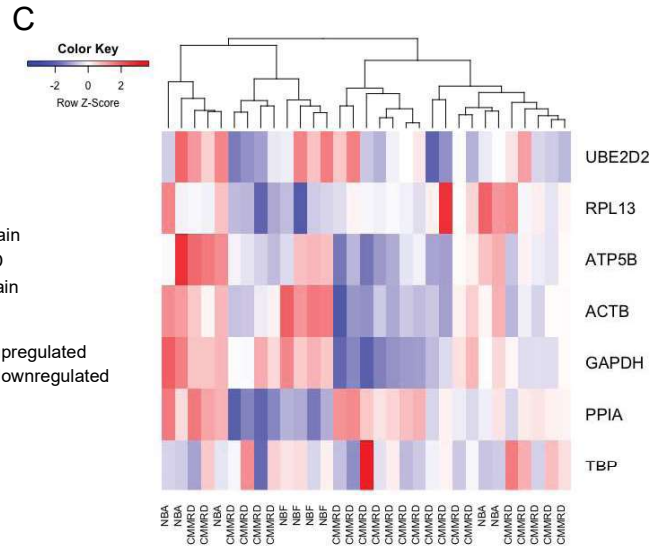

Supplemental Figure 4: A) Multidimensional scaling plot demonstrating clustering of CMMRD tumors, normal fetal brain, and normal adult brain based on RNA sequencing count data. CMMRD tumors cluster distinctly from normal fetal and adult brain. Normal fetal brain and adult brain also show distinct expression patterns. B) Unsupervised clustering of CMMRD tumors (n=22), normal fetal brains (n=4), and normal adult brains (n=5) based on expression of PROGENY 100 MAPK pathway transcriptional output signature genes. C) Control clustering for all tumors based on expression of a set of randomly selected housekeeping genes demonstrates that clustering distinctly does not occur nonspecifically.



# Replication Repair Deficient (RRD) hypermutant brain tumors

1. Patient ID: MMR138  
 Tumor Type: Anaplastic Astrocytoma  
 Germline: *POLE* P436R mutation  
 Mutation burden: 191 mut/mb

| RAS/MAPK Gene | AA Change | VAF  |
|---------------|-----------|------|
| <i>NRAS</i>   | S106A     | 0.08 |
| <i>NRAS</i>   | E98K      | 0.08 |
| <i>MAP3K1</i> | S418Y     | 0.05 |
| <i>MAP2K1</i> | D67N      | 0.07 |
| <i>NF1</i>    | T1843A    | 0.1  |

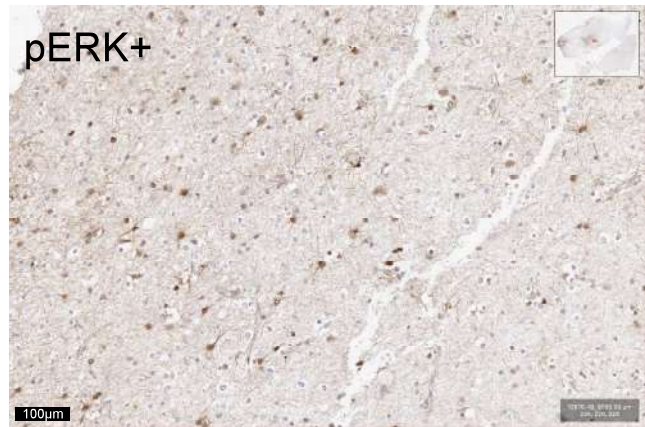

2. Patient ID: MMR142  
 Tumor Type: Anaplastic Oligodendroglioma  
 Germline: *MSH2* Exon 1-6 deletion  
 Mutation Burden: 194 mut/mb

| RAS/MAPK Gene | AA Change | VAF  |
|---------------|-----------|------|
| <i>MAP3K1</i> | P1115Q    | 0.07 |
| <i>MAP3K1</i> | P1493H    | 0.06 |

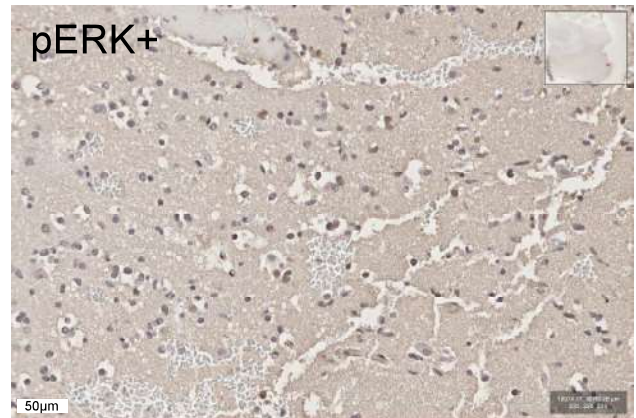

3. Patient ID: MMR101  
 Tumor Type: Glioblastoma  
 Germline: Biallelic *PMS2* deletion  
 Mutation Burden: 541 mut/mb

| RAS/MAPK Gene | AA Change | VAF  |
|---------------|-----------|------|
| <i>NF1</i>    | A463T     | 0.39 |
| <i>NF1</i>    | G2003X    | 0.14 |
| <i>NF1</i>    | A2753T    | 0.11 |
| <i>NF1</i>    | S413X     | 0.06 |
| <i>RAF1</i>   | A628T     | 0.25 |
| <i>RAF1</i>   | N140T     | 0.12 |
| <i>MAP2K2</i> | R371W     | 0.06 |

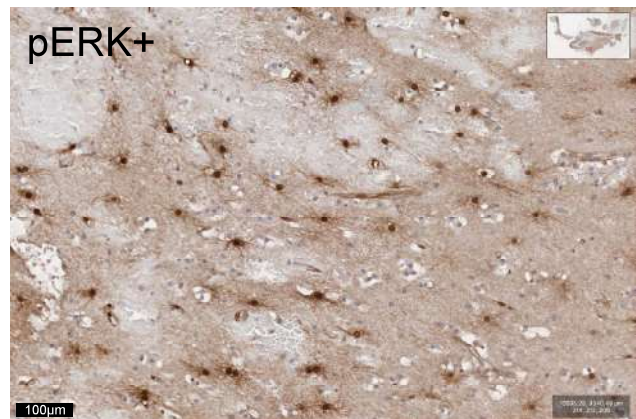

# Replication Repair Deficient (RRD) hypermutant brain tumors

4. Patient ID: MMR100  
 Tumor Type: Glioblastoma Multiforme  
 Germline: Biallelic *PMS2* deletion  
 Mutation burden: 496 mut/mb

| RAS/MAPK Gene | AA Change | VAF  |
|---------------|-----------|------|
| <i>NF1</i>    | A198S     | 0.42 |
| <i>NF1</i>    | R1416M    | 0.42 |
| <i>NF1</i>    | R2237X    | 0.38 |
| <i>NF1</i>    | R720Q     | 0.37 |
| <i>NF1</i>    | T1013M    | 0.05 |
| <i>NF1</i>    | L121I     | 0.04 |
| <i>MAP3K2</i> | Q429H     | 0.53 |
| <i>MAP2K2</i> | R164M     | 0.42 |
| <i>MAPK1</i>  | P268S     | 0.39 |
| <i>BRAF</i>   | D213N     | 0.11 |
| <i>KRAS</i>   | T50I      | 0.07 |
| <i>MAPK3</i>  | D192N     | 0.05 |

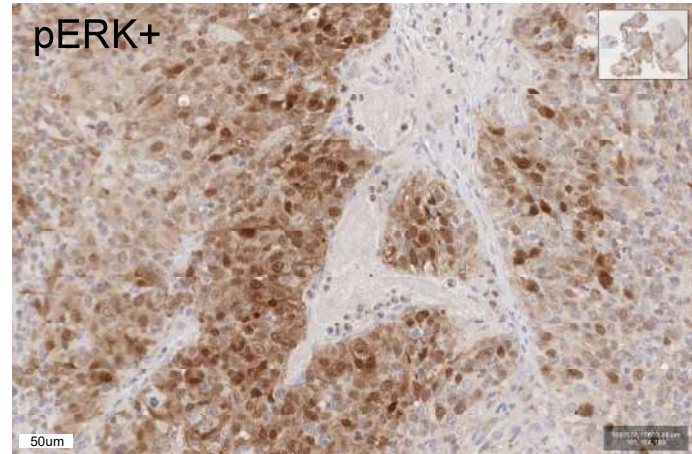

5. Patient ID: MMR190  
 Tumor Type: Glioblastoma Multiforme  
 Germline: Biallelic *PMS2* mutation  
 Mutation burden: 183 mut/mb

| RAS/MAPK Gene | AA Change | VAF   |
|---------------|-----------|-------|
| <i>NF1</i>    | I1679V    | 0.51  |
| <i>NF1</i>    | R156H     | 0.47  |
| <i>NF1</i>    | E152*     | 0.44  |
| <i>NF1</i>    | A422T     | 0.411 |
| <i>NF1</i>    | R652H     | 0.25  |
| <i>NF1</i>    | Q1775*    | 0.14  |
| <i>NF1</i>    | M747I     | 0.08  |
| <i>NF1</i>    | R816*     | 0.07  |
| <i>NF1</i>    | A548D     | 0.07  |
| <i>NF1</i>    | A887T     | 0.04  |
| <i>HRAS</i>   | V109M     | 0.33  |
| <i>HRAS</i>   | D105Y     | 0.08  |
| <i>HRAS</i>   | R68W      | 0.02  |
| <i>MAP3K1</i> | D806N     | 0.49  |
| <i>MAP3K1</i> | V906I     | 0.49  |
| <i>MAP3K1</i> | R1368K    | 0.12  |
| <i>MAP3K1</i> | R306H     | 0.04  |

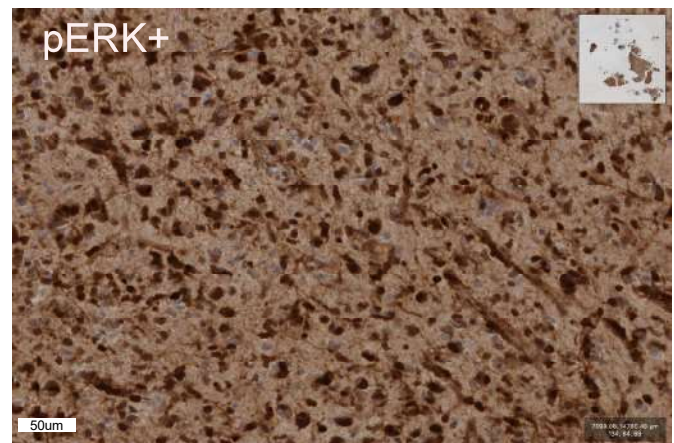

6. Patient ID: MMR152  
 Tumor Type: Glioblastoma Multiforme  
 Germline: Biallelic MMR  
 Mutation burden: 182 mut/mb

| RAS/MAPK Gene | AA Change | VAF  |
|---------------|-----------|------|
| <i>NRAS</i>   | E63K      | 0.34 |
| <i>NF1</i>    | A2737V    | 0.18 |

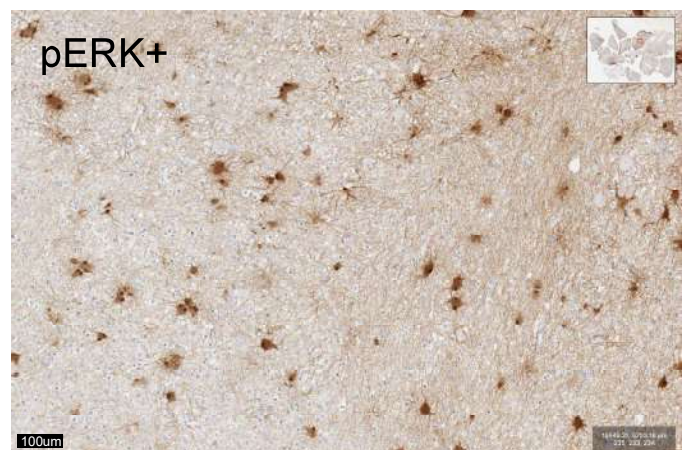



# Replication Repair Deficient (RRD) hypermutant brain tumors

7. Patient ID: MMR134  
Tumor Type: Glioblastoma Multiforme  
Germline: Biallelic *PMS2* mutation  
Mutation burden: 50 mut/mb

| RAS/MAPK Gene | AA Change | VAF  |
|---------------|-----------|------|
| <i>NF1</i>    | R1554M    | 0.48 |
| <i>NF1</i>    | G1692E    | 0.48 |
| <i>NF1</i>    | A2603T    | 0.47 |
| <i>MAP3K1</i> | P301T     | 0.44 |
| <i>MAP3K1</i> | L639M     | 0.45 |
| <i>BRAF</i>   | G104R     | 0.42 |
| <i>MAP2K1</i> | E333D     | 0.48 |

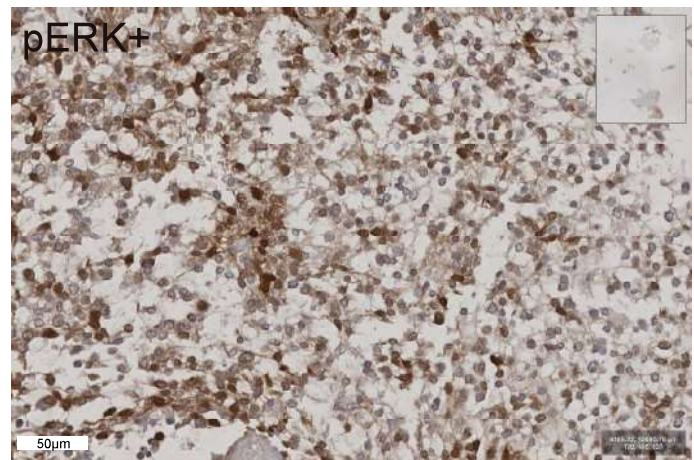

8. Patient ID: MMR1293  
Tumor Type: Glioblastoma Multiforme  
Germline: Biallelic *MMR*  
Mutation burden: 161 mut/mb

| RAS/MAPK Gene | AA Change | VAF  |
|---------------|-----------|------|
| <i>NF1</i>    | G2024X    | 0.28 |
| <i>NF1</i>    | T1546I    | 0.26 |
| <i>NF1</i>    | S2817P    | 0.22 |
| <i>MAPK1</i>  | A352V     | 0.54 |

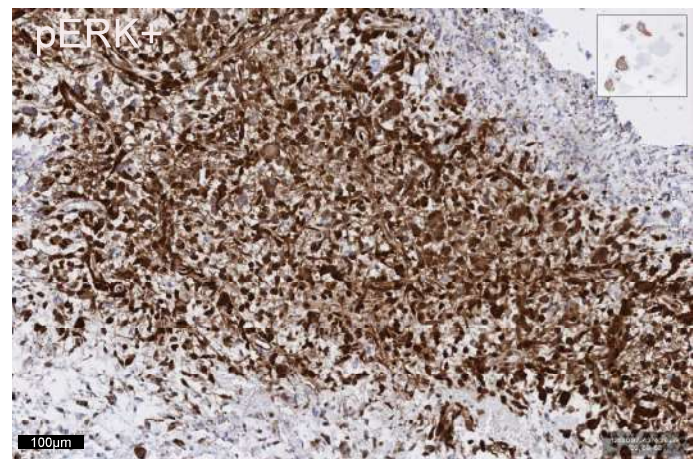

9. Patient ID: MMR1273  
Tumor Type: Glioblastoma Multiforme  
Germline: Biallelic *PMS2* mutations, *DICER1* mutation  
Mutation burden: 121 mut/mb

| RAS/MAPK Gene | AA Change | VAF   |
|---------------|-----------|-------|
| <i>NF1</i>    | V1212I    | 0.345 |

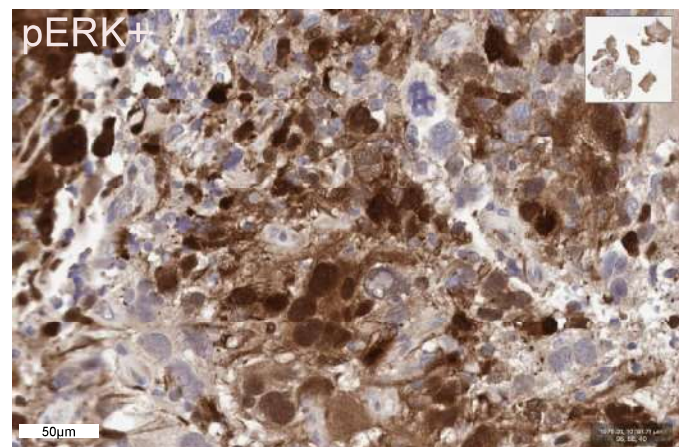



# Replication Repair Deficient (RRD) hypermutant brain tumors

Patient ID: MMR109  
Tumor Type: Glioblastoma Multiforme  
Germline: Biallelic *MSH2* mutations  
Mutation burden: Not available

RAS/MAPK Gene AA Change VAF

Not available

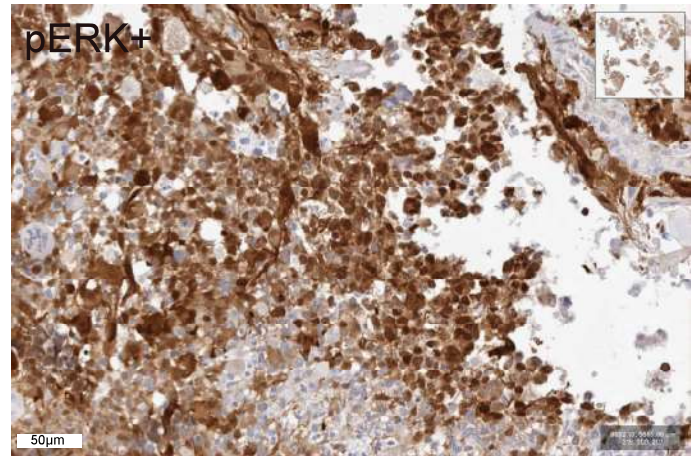

Patient ID: MMR110  
Tumor Type: Glioblastoma Multiforme  
Germline: Biallelic *MSH2* mutations  
Mutation burden: Not available

RAS/MAPK Gene AA Change VAF

Not available

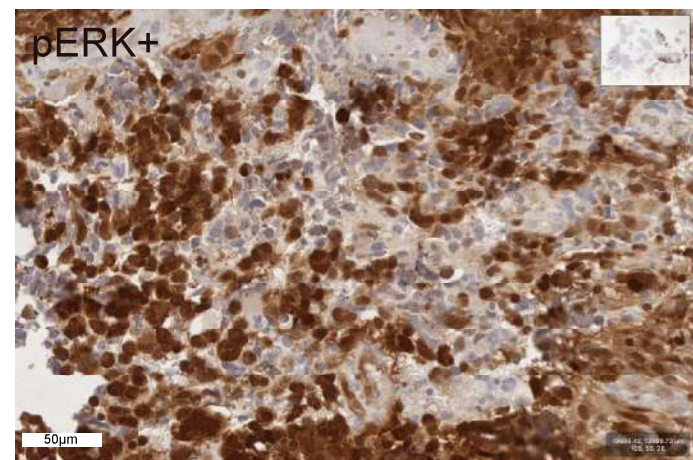

# Replication Repair Deficient (RRD) hypermutant colorectal tumors

12. Patient ID: MMR66  
 Tumor Type: Colorectal Adenocarcinoma  
 Germline:  
 Mutation burden: 99 mut/mb

| RAS/MAPK Gene | AA Change | VAF  |
|---------------|-----------|------|
| <i>NRAS</i>   | Y137C     | 0.1  |
| <i>MAP3K1</i> | A660V     | 0.14 |

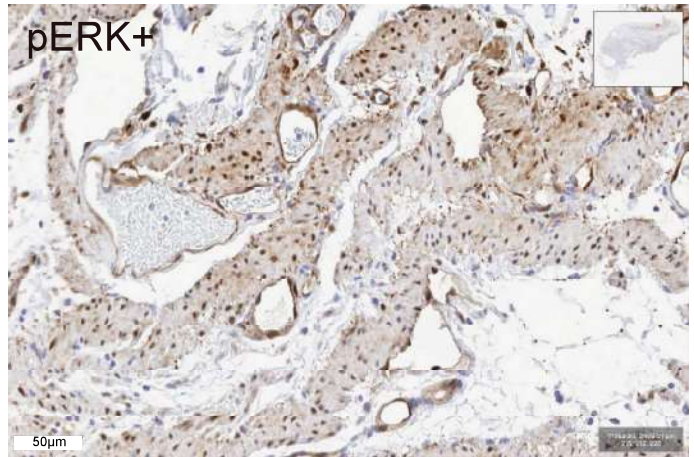

13. Patient ID: MMR138  
 Tumor Type: Colorectal Adenocarcinoma  
 Germline: *POLE* P436R mutation  
 Mutation burden: 495 mut/mb

| RAS/MAPK Gene | AA Change | VAF  |
|---------------|-----------|------|
| <i>NRAS</i>   | S106A     | 0.28 |
| <i>NRAS</i>   | E98K      | 0.27 |
| <i>NRAS</i>   | K170T     | 0.08 |
| <i>KRAS</i>   | Q22H      | 0.2  |
| <i>MAP3K1</i> | S418Y     | 0.1  |
| <i>MAP2K1</i> | D67N      | 0.25 |
| <i>NF1</i>    | N45D      | 0.16 |
| <i>NF1</i>    | G57S      | 0.16 |
| <i>NF1</i>    | C673G     | 0.18 |
| <i>NF1</i>    | G949X     | 0.18 |
| <i>NF1</i>    | T1843A    | 0.19 |
| <i>NF1</i>    | R2083C    | 0.15 |

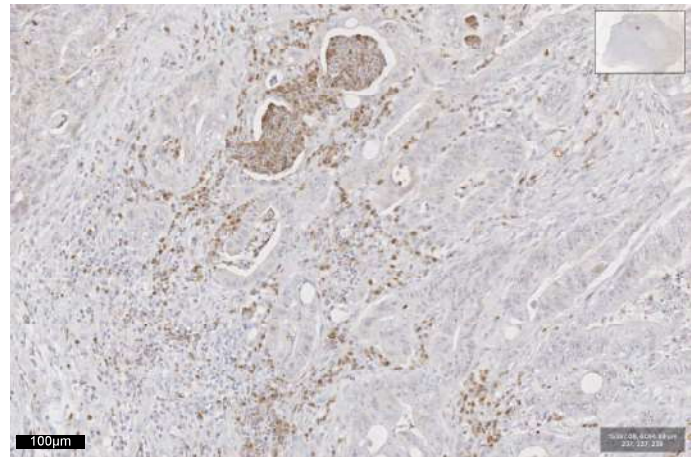

Supplemental Figure 5: Immunohistochemical staining of 10 hypermutant replication repair deficient gliomas and 1 hypermutant replication repair deficient colorectal cancers. Germline status is shown, along with various mutations in RAS/MAPK pathway genes and their variant allele fractions. Black bars indicate 100µm; white scale bars indicate 50µm.

LoVo Mutation Burden: 66 mut/mb

RAS/MAPK pathway mutations

| Gene | AA Change | Type     |
|------|-----------|----------|
| KRAS | G13D      | Missense |
| NF1  | R1696Q    | Missense |
| RAF1 | V98A      | Missense |

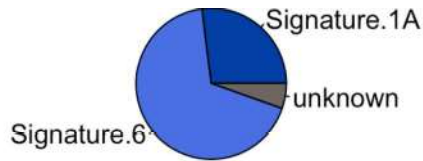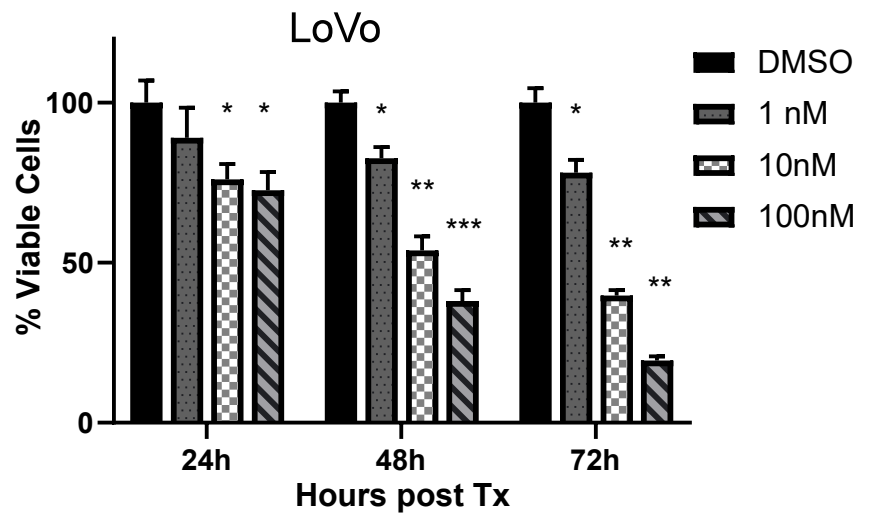

HCT-116 Mutation Burden: 88 mut/mb

RAS/MAPK pathway mutations

| Gene   | AA Change | Type       |
|--------|-----------|------------|
| KRAS   | G13D      | Missense   |
| MAP3K1 | R351C     | Missense   |
| NF1    | T676fs    | Frameshift |

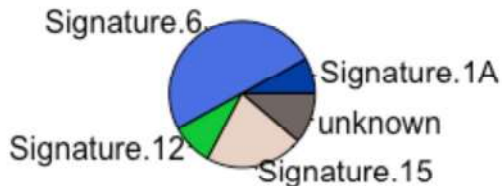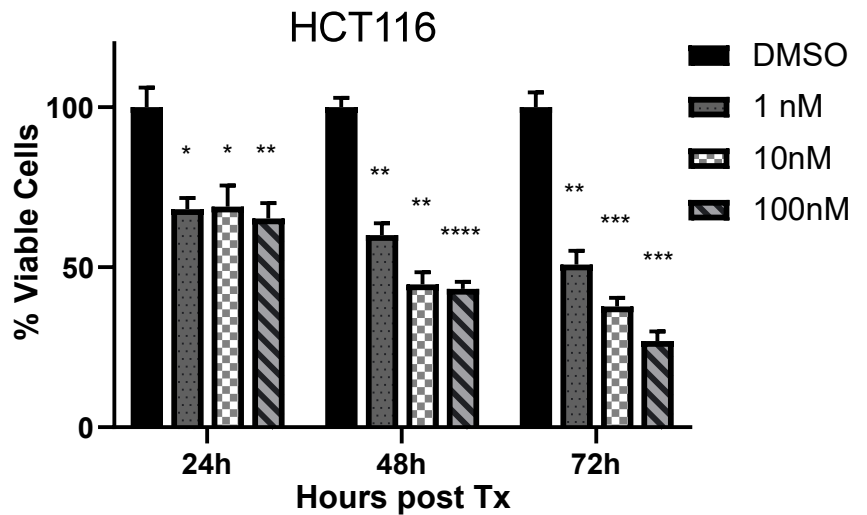

HCT15 Mutation Burden: 212 mut/mb

| Gene  | AA Change | Type     |
|-------|-----------|----------|
| POLD1 | R689W     | Missense |

RAS/MAPK pathway mutations

| Gene   | AA Change | Type     |
|--------|-----------|----------|
| KRAS   | G13D      | Missense |
| MAP3K1 | p.P1474H  | Missense |
| MAP3K1 | p.A552V   | Missense |
| MAP3K4 | p.I484V   | Missense |
| MAP3K4 | p.K814R   | Missense |
| MAP3K6 | p.P870Q   | Missense |
| NF1    | p.A74D    | Missense |
| NF1    | p.P2477S  | Missense |
| NF1    | p.A2617V  | Missense |

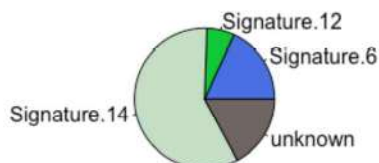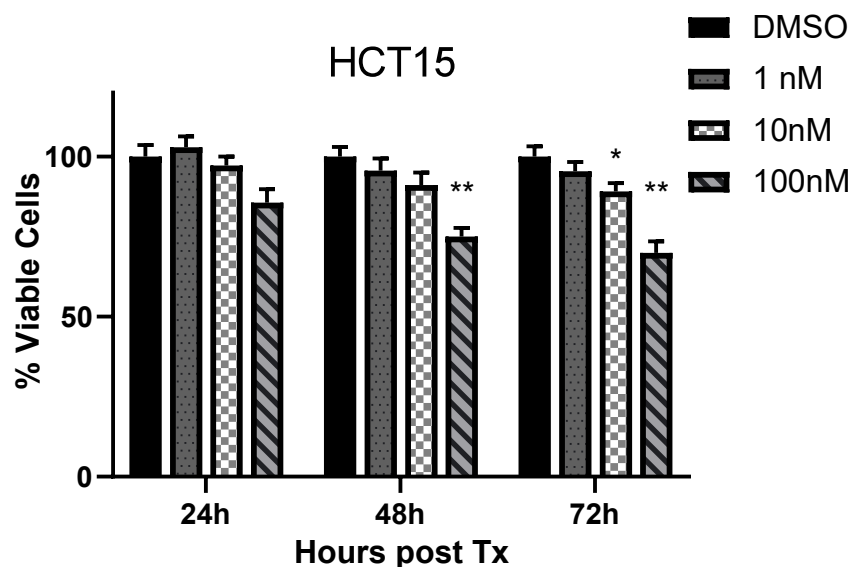

Supplemental Figure 6: Three established hypermutant colorectal cancer MMR-deficient cell lines (LoVo, HCT116, and HCT15) harbor several RAS/MAPK pathway promoting mutations and COSMIC signatures related to MMR and/or polymerase exonuclease deficiency (*left*). Mutational signatures reflect MMR deficiency as a source of hypermutation. Cell lines were treated with Trametinib concentrations ranging from 1nM - 100 nM and viable cells were measured using a hemocytometer at 24, 48, and 72 hours post treatment (*right*). Cell number percentages were normalized to DMSO. Three technical replicates were analysed and are shown as mean and SD. Statistical significance was assessed by ANOVA (\* $p < 0.05$ ; \*\* $p < 0.01$ ; \*\*\* $p < 0.001$ ; and \*\*\*\* $p < 0.0001$ ).

**A** MMR190 - Glioblastoma multiforme  
 Mutaional Burden = 328 mut/mb

| Gene   | AA change | Allelic Frequency |
|--------|-----------|-------------------|
| NF1    | R156H     | 0.526             |
| NF1    | A422T     | 0.424             |
| NF1    | M747I     | 0.087             |
| NF1    | E1582*    | 0.458             |
| NF1    | Q1775*    | 0.094             |
| MAP3K1 | R377fs    | 0.235             |
| MAP3K2 | T293A     | 0.333             |
| PTPN11 | R502W     | 0.575             |

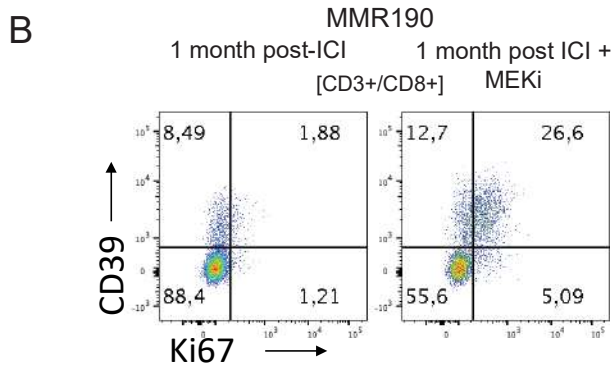

Supplemental Figure 7: Combination anti-PD1 and MEK inhibition promotes an anti-tumor immune response. A) Mutational burden and RAS/MAPK pathway mutations detected by exome sequencing of GMB tumor from patient MMR190. B) Expression of CD39 on Ki67<sup>+</sup>CD3<sup>+</sup>CD8<sup>+</sup> PBMCs using flow cytometry post anti-PD1 treatment alone (left) and combination anti-PD1 + Trametinib treatment (right). \* = stopgain mutation; fs = frameshift mutation; ICI = anti-PD1; MEKi = Trametinib.
